# Supplementary material for: Incidence of type 2 diabetes mellitus in men receiving steroid 5α-reductase inhibitors: population based cohort study
Source: PubMed Central journal article supplement (PMC6456811; doi:10.1136/bmj.l1204), 2019-04-10
Supplement: weil046562.ww1.pdf [file weil046562.ww1.pdf]

## **On-line Only Supplements**

- 1) Main analysis: on-line only Tables S1-4
- 2) Assessment of Confounding but Tamsulosin with online-only Tables S5-S6.

**Supplementary Table S1A: Read codes for Benign Prostatic Hypertrophy and Transurethral resection of the prostate**

Read codes are the standard clinical terminology system used in General Practice in the United Kingdom.

| <b>Benign prostatic hypertrophy</b>                    |                                                          |
|--------------------------------------------------------|----------------------------------------------------------|
| <b>Read Code</b>                                       | <b>Read Term</b>                                         |
| K20..15                                                | BPH - benign prostatic hypertrophy                       |
| K20..00                                                | Benign prostatic hypertrophy                             |
| K200.00                                                | Prostatic hyperplasia unspecified                        |
| K20z.00                                                | Prostatic hyperplasia NOS                                |
| <b>Transurethral resection of the prostate (TURPS)</b> |                                                          |
| <b>Read Code</b>                                       | <b>Read Term</b>                                         |
| 7B39000                                                | Transurethral prostatectomy                              |
| 7B3C500                                                | Transurethral biopsy prostate                            |
| 7B3A400                                                | Transurethral incision of prostate                       |
| 7B3B900                                                | Endoscopic transurethral electrovaporisation of prostate |

**Supplementary Table S1B: Read codes for Type 2 Diabetes Mellitus in CPRD database**

| <b>Read Code</b> | <b>Read Term</b>                                           |
|------------------|------------------------------------------------------------|
| ZV65312          | [V]Dietary counselling in diabetes mellitus                |
| Cyu2.00          | [X]Diabetes mellitus                                       |
| Cyu2000          | [X]Other specified diabetes mellitus                       |
| F171100          | Autonomic neuropathy due to diabetes                       |
| C104z00          | Diabetes mellitus with nephropathy NOS                     |
| C10..00          | Diabetes mellitus                                          |
| C10C.00          | Diabetes mellitus autosomal dominant                       |
| C10D.00          | Diabetes mellitus autosomal dominant type 2                |
| C102z00          | Diabetes mellitus NOS with hyperosmolar coma               |
| C101z00          | Diabetes mellitus NOS with ketoacidosis                    |
| C103z00          | Diabetes mellitus NOS with ketoacidotic coma               |
| C106z00          | Diabetes mellitus NOS with neurological manifestation      |
| C100z00          | Diabetes mellitus NOS with no mention of complication      |
| C105z00          | Diabetes mellitus NOS with ophthalmic manifestation        |
| C10yz00          | Diabetes mellitus NOS with other specified manifestation   |
| C107z00          | Diabetes mellitus NOS with peripheral circulatory disorder |
| C10zz00          | Diabetes mellitus NOS with unspecified complication        |
| C107.11          | Diabetes mellitus with gangrene                            |
| C102.00          | Diabetes mellitus with hyperosmolar coma                   |
| C101.00          | Diabetes mellitus with ketoacidosis                        |
| C103.00          | Diabetes mellitus with ketoacidotic coma                   |
| C106.00          | Diabetes mellitus with neurological manifestation          |
| C106.12          | Diabetes mellitus with neuropathy                          |
| C100.00          | Diabetes mellitus with no mention of complication          |
| C105.00          | Diabetes mellitus with ophthalmic manifestation            |
| C10y.00          | Diabetes mellitus with other specified manifestation       |
| C107.00          | Diabetes mellitus with peripheral circulatory disorder     |
| C106.13          | Diabetes mellitus with polyneuropathy                      |
| C104.00          | Diabetes mellitus with renal manifestation                 |

|         |                                                              |
|---------|--------------------------------------------------------------|
| C10z.00 | Diabetes mellitus with unspecified complication              |
| C106100 | Diabetes mellitus, adult onset, + neurological manifestation |
| C105100 | Diabetes mellitus, adult onset, + ophthalmic manifestation   |
| C10z100 | Diabetes mellitus, adult onset, + unspecified complication   |
| C100100 | Diabetes mellitus, adult onset, no mention of complication   |
| C102100 | Diabetes mellitus, adult onset, with hyperosmolar coma       |
| C101100 | Diabetes mellitus, adult onset, with ketoacidosis            |
| C103100 | Diabetes mellitus, adult onset, with ketoacidotic coma       |
| C104100 | Diabetes mellitus, adult onset, with renal manifestation     |
| C107200 | Diabetes mellitus, adult with gangrene                       |
| C10y100 | Diabetes mellitus, adult, + other specified manifestation    |
| C107100 | Diabetes mellitus, adult, + peripheral circulatory disorder  |
| 66Ao.00 | Diabetes type 2 review                                       |
| ZC2CA00 | Dietary advice for type II diabetes                          |
| 2G51000 | Foot abnormality - diabetes related                          |
| 2G5C.00 | Foot abnormality - diabetes related                          |
| C109K00 | Hyperosmolar non-ketotic state in type 2 diabetes mellitus   |
| C10FK00 | Hyperosmolar non-ketotic state in type 2 diabetes mellitus   |
| C10A100 | Malnutrition-related diabetes mellitus with ketoacidosis     |
| K01x100 | Nephrotic syndrome in diabetes mellitus                      |
| C109.11 | NIDDM - Non-insulin dependent diabetes mellitus              |
| C109E00 | Non-insulin depend diabetes mellitus with diabetic cataract  |
| C109700 | Non-insulin dependent diabetes mellitus - poor control       |
| C109.00 | Non-insulin dependent diabetes mellitus                      |
| C109G00 | Non-insulin dependent diabetes mellitus with arthropathy     |
| C109500 | Non-insulin dependent diabetes mellitus with gangrene        |
| C109D00 | Non-insulin dependent diabetes mellitus with hypoglyca coma  |
| C109A00 | Non-insulin dependent diabetes mellitus with mononeuropathy  |
| C109C00 | Non-insulin dependent diabetes mellitus with nephropathy     |
| C109B00 | Non-insulin dependent diabetes mellitus with polyneuropathy  |
| C109400 | Non-insulin dependent diabetes mellitus with ulcer           |
| C109300 | Non-insulin-dependent diabetes mellitus with multiple comps  |
| C109200 | Non-insulin-dependent diabetes mellitus with neuro comps     |
| C109100 | Non-insulin-dependent diabetes mellitus with ophthalm comps  |
| C109000 | Non-insulin-dependent diabetes mellitus with renal comps     |
| C109600 | Non-insulin-dependent diabetes mellitus with retinopathy     |
| C109900 | Non-insulin-dependent diabetes mellitus without complication |
| C103y00 | Other specified diabetes mellitus with coma                  |
| C101y00 | Other specified diabetes mellitus with ketoacidosis          |
| C108y00 | Other specified diabetes mellitus with multiple comps        |
| C106y00 | Other specified diabetes mellitus with neurological comps    |
| C105y00 | Other specified diabetes mellitus with ophthalmic complicatn |
| C10yy00 | Other specified diabetes mellitus with other spec comps      |
| C104y00 | Other specified diabetes mellitus with renal complications   |
| C10zy00 | Other specified diabetes mellitus with unspecified comps     |
| 8BL2.00 | Patient on maximal tolerated therapy for diabetes            |
| ZRbH.00 | Perceived control of insulin-dependent diabetes              |
| F372.00 | Polyneuropathy in diabetes                                   |
| L180600 | Pre-existing diabetes mellitus, non-insulin-dependent        |
| 2BBF.00 | Retinal abnormality - diabetes related                       |
| C10N.00 | Secondary diabetes mellitus                                  |
| C10N000 | Secondary diabetes mellitus without complication             |
| C109.12 | Type 2 diabetes mellitus                                     |
| C10F.00 | Type 2 diabetes mellitus                                     |
| C109712 | Type 2 diabetes mellitus - poor control                      |
| C10F700 | Type 2 diabetes mellitus - poor control                      |
| C109G12 | Type 2 diabetes mellitus with arthropathy                    |
| C10FG00 | Type 2 diabetes mellitus with arthropathy                    |

|         |                                                            |
|---------|------------------------------------------------------------|
| C109E12 | Type 2 diabetes mellitus with diabetic cataract            |
| C10FE00 | Type 2 diabetes mellitus with diabetic cataract            |
| C10FQ00 | Type 2 diabetes mellitus with exudative maculopathy        |
| C109512 | Type 2 diabetes mellitus with gangrene                     |
| C10F500 | Type 2 diabetes mellitus with gangrene                     |
| C10FR00 | Type 2 diabetes mellitus with gastroparesis                |
| C109D12 | Type 2 diabetes mellitus with hypoglycaemic coma           |
| C10FD00 | Type 2 diabetes mellitus with hypoglycaemic coma           |
| C10FN00 | Type 2 diabetes mellitus with ketoacidosis                 |
| C10FP00 | Type 2 diabetes mellitus with ketoacidotic coma            |
| C10FA00 | Type 2 diabetes mellitus with mononeuropathy               |
| C10F300 | Type 2 diabetes mellitus with multiple complications       |
| C109C12 | Type 2 diabetes mellitus with nephropathy                  |
| C10FC00 | Type 2 diabetes mellitus with nephropathy                  |
| C109212 | Type 2 diabetes mellitus with neurological complications   |
| C10F200 | Type 2 diabetes mellitus with neurological complications   |
| C109H12 | Type 2 diabetes mellitus with neuropathic arthropathy      |
| C10FH00 | Type 2 diabetes mellitus with neuropathic arthropathy      |
| C109112 | Type 2 diabetes mellitus with ophthalmic complications     |
| C10F100 | Type 2 diabetes mellitus with ophthalmic complications     |
| C109F12 | Type 2 diabetes mellitus with peripheral angiopathy        |
| C10FF00 | Type 2 diabetes mellitus with peripheral angiopathy        |
| C10FM00 | Type 2 diabetes mellitus with persistent microalbuminuria  |
| C10FL00 | Type 2 diabetes mellitus with persistent proteinuria       |
| C10FB00 | Type 2 diabetes mellitus with polyneuropathy               |
| C109012 | Type 2 diabetes mellitus with renal complications          |
| C10F000 | Type 2 diabetes mellitus with renal complications          |
| C109612 | Type 2 diabetes mellitus with retinopathy                  |
| C10F600 | Type 2 diabetes mellitus with retinopathy                  |
| C109412 | Type 2 diabetes mellitus with ulcer                        |
| C10F400 | Type 2 diabetes mellitus with ulcer                        |
| C10F900 | Type 2 diabetes mellitus without complication              |
| C109.13 | Type II diabetes mellitus                                  |
| C10F.11 | Type II diabetes mellitus                                  |
| C109711 | Type II diabetes mellitus - poor control                   |
| C10F711 | Type II diabetes mellitus - poor control                   |
| C109G11 | Type II diabetes mellitus with arthropathy                 |
| C109E11 | Type II diabetes mellitus with diabetic cataract           |
| C10FE11 | Type II diabetes mellitus with diabetic cataract           |
| C109511 | Type II diabetes mellitus with gangrene                    |
| C109D11 | Type II diabetes mellitus with hypoglycaemic coma          |
| C109A11 | Type II diabetes mellitus with mononeuropathy              |
| C10F311 | Type II diabetes mellitus with multiple complications      |
| C109C11 | Type II diabetes mellitus with nephropathy                 |
| C109211 | Type II diabetes mellitus with neurological complications  |
| C109H11 | Type II diabetes mellitus with neuropathic arthropathy     |
| C109111 | Type II diabetes mellitus with ophthalmic complications    |
| C109F11 | Type II diabetes mellitus with peripheral angiopathy       |
| C10FM11 | Type II diabetes mellitus with persistent microalbuminuria |
| C10FL11 | Type II diabetes mellitus with persistent proteinuria      |
| C109B11 | Type II diabetes mellitus with polyneuropathy              |
| C10FB11 | Type II diabetes mellitus with polyneuropathy              |
| C109011 | Type II diabetes mellitus with renal complications         |
| C10F011 | Type II diabetes mellitus with renal complications         |
| C109611 | Type II diabetes mellitus with retinopathy                 |
| C10F611 | Type II diabetes mellitus with retinopathy                 |
| C109411 | Type II diabetes mellitus with ulcer                       |
| C10F411 | Type II diabetes mellitus with ulcer                       |

|         |                                                           |
|---------|-----------------------------------------------------------|
| C10F911 | Type II diabetes mellitus without complication            |
| C108z00 | Unspecified diabetes mellitus with multiple complications |
| 66AJ.11 | Unstable diabetes                                         |

**Supplementary Table S2: Baseline characteristics for total cohorts, receiving single or combination therapies (UK CPRD database)**

|                                        | Dutasteride ±<br>tamsulosin<br>N=8830 | Finasteride ±<br>tamsulosin<br>N=33396 | Tamsulosin<br>N=16270 | P value |
|----------------------------------------|---------------------------------------|----------------------------------------|-----------------------|---------|
| Age (y)                                | 71.8 (9.8)                            | 72.2 (10.8)                            | 69.1 (10.3)           | <0.01   |
| BMI category* (kg/m <sup>2</sup> )     |                                       |                                        |                       | 0.01    |
| 1 (<18.5)                              | 47 (0.6)                              | 206 (0.7)                              | 91 (0.6)              |         |
| 2 (18.5-25)                            | 2613 (34.7)                           | 9815 (34.9)                            | 4794 (33.6)           |         |
| 3 (25-30)                              | 3541 (47.1)                           | 12953 (46.1)                           | 6846 (48.1)           |         |
| 4 (>30)                                | 1321 (17.6)                           | 5135 (18.3)                            | 2518 (17.7)           |         |
| Smoking status*                        |                                       |                                        |                       | <0.01   |
| 1 – Yes                                | 917 (10.8)                            | 3540 (11.2)                            | 1859 (11.8)           |         |
| 2 – No                                 | 4058 (47.7)                           | 14511 (45.9)                           | 7485(47.4)            |         |
| 3 – Ex                                 | 3538 (41.6)                           | 13541 (42.9)                           | 6458 (40.9)           |         |
| Physical activity*                     |                                       |                                        |                       | <0.01   |
| 1 – Inactive                           | 406 (9.8)                             | 1442 (9.7)                             | 699 (9.6)             |         |
| 2 – Gentle                             | 1259 (36.9)                           | 5765 (38.9)                            | 2636 (34.1)           |         |
| 3 – Moderate                           | 1989 (48.0)                           | 6894 (46.6)                            | 39.7 (50.7)           |         |
| 4 – Vigorous                           | 219 (5.3)                             | 706 (4.8)                              | 473 (6.1)             |         |
| Alcohol consumption*                   |                                       |                                        |                       | <0.01   |
| 1 – Yes                                | 6339 (82.1)                           | 23720 (82.4)                           | 12233 (84.4)          |         |
| 2 – No                                 | 1043 (14.8)                           | 4145 (14.4)                            | 1850 (12.8)           |         |
| 3 – Ex                                 | 238 (3.1)                             | 914 (3.2)                              | 416 (2.9)             |         |
| Duration of BPH (days)<br>median (IQR) | 15 (0-1292)                           | 13 (0-1075)                            | 56 (27-892)           | <0.01   |
| Disease history                        |                                       |                                        |                       |         |
| COPD                                   | 679 (7.7)                             | 2818 (8.4)                             | 1169 (7.2)            | <0.01   |
| Dyslipidaemia                          | 1349 (15.3)                           | 4723 (14.1)                            | 2711 (16.7)           | <0.01   |
| Hypertension                           | 3015 (34.1)                           | 12053 (36.1)                           | 5241 (32.2)           | <0.01   |
| Beta blockers                          | 2312 (26.2)                           | 8225 (24.6)                            | 3471 (21.3)           | <0.01   |
| Statins                                | 3496 (40.0)                           | 12745 (38.2)                           | 5871 (369.1)          | <0.01   |
| ACEs                                   | 2411 (27.3)                           | 9350 (28.0)                            | 3844 (23.6)           | <0.01   |
| ARBs                                   | 891 (10.1)                            | 3038 (9.2)                             | 1359 (8.4)            | <0.01   |
| Diuretics                              | 2597 (29.4)                           | 10026 (30.0)                           | 3669 (22.6)           | <0.01   |
| Oral corticosteroids                   | 954 (10.8)                            | 53384 (10.1)                           | 1497 (9.2)            | <0.01   |
| Number of GP contacts                  | 10.6 (2.2)                            | 10.2 (2.4)                             | 10.0 (2.4)            | <0.01   |

Data are numbers (%) of subjects unless otherwise stated.

BMI = Body Mass Index; BPH = Benign Prostatic Hyperplasia; COPD = Chronic Obstructive Pulmonary Disease; ACEs = Angiotensin converting enzyme inhibitors; ARBs = Angiotensin receptor blocker; GP = General Practitioner; OPD = Out-patient Department. Data show mean (standard deviation; SD) unless otherwise stated. IQR = Interquartile range. \* Excluding missing data.

**Supplementary Table S3: Baseline characteristics for total cohorts receiving single or combination therapies (NHIRD database)**

|                                        | Dutasteride ±<br>tamsulosin<br>N=1455 | Finasteride ±<br>tamsulosin<br>N=4700 | Tamsulosin<br>N=86263 | P value |
|----------------------------------------|---------------------------------------|---------------------------------------|-----------------------|---------|
| Age (y)                                | 68.7 (10.7)                           | 68.5 (10.9)                           | 65.7 (11.6)           | <0.01   |
| BMI category* (kg/m <sup>2</sup> )     |                                       |                                       |                       |         |
| 1 (<18.5)                              | NA                                    | NA                                    | NA                    | NA      |
| 2 (18.5-25)                            | NA                                    | NA                                    | NA                    | NA      |
| 3 (25-30)                              | NA                                    | NA                                    | NA                    | NA      |
| 4 (>30)                                | NA                                    | NA                                    | NA                    | NA      |
| Smoking status*                        |                                       |                                       |                       |         |
| 1 – Yes                                | NA                                    | NA                                    | NA                    | NA      |
| 2 – No                                 | NA                                    | NA                                    | NA                    | NA      |
| 3 – Ex                                 | NA                                    | NA                                    | NA                    | NA      |
| Physical activity*                     |                                       |                                       |                       |         |
| 1 – Inactive                           | NA                                    | NA                                    | NA                    | NA      |
| 2 – Gentle                             | NA                                    | NA                                    | NA                    | NA      |
| 3 – Moderate                           | NA                                    | NA                                    | NA                    | NA      |
| 4 – Vigorous                           | NA                                    | NA                                    | NA                    | NA      |
| Alcohol consumption*                   |                                       |                                       |                       |         |
| 1 – Yes                                | NA                                    | NA                                    | NA                    | NA      |
| 2 – No                                 | NA                                    | NA                                    | NA                    | NA      |
| 3 – Ex                                 | NA                                    | NA                                    | NA                    | NA      |
| Duration of BPH (days)<br>median (IQR) | 29 (0-286)                            | 27 (0-240)                            | 21 (39-724)           | <0.01   |
| Disease history                        |                                       |                                       |                       |         |
| COPD                                   | 123 (8.5)                             | 455 (9.7)                             | 7491 (8.7)            | <0.01   |
| Dyslipidaemia                          | 329 (22.6)                            | 692 (14.7)                            | 14609 (16.9)          | <0.01   |
| Hypertension                           | 727 (50.0)                            | 2049 (43.6)                           | 36653 (42.5)          | <0.01   |
| Beta blockers                          | 382 (26.3)                            | 1144(24.3)                            | 20868 (24.2)          | <0.01   |
| Statins                                | 263 (18.1)                            | 451 (9.6)                             | 968 (11.2)            | <0.01   |
| ACEs                                   | 369 (25.4)                            | 1089 (23.2)                           | 17252 (20.0)          | <0.01   |
| ARBs                                   | 161 (11.1)                            | 539 (11.5)                            | 8799 (10.2)           | <0.01   |
| Diuretics                              | 200 (13.7)                            | 689 (14.7)                            | 12718 (14.7)          | <0.01   |
| Oral corticosteroids                   | 398 (27.4)                            | 1202 (25.6)                           | 24177(28)             | <0.01   |
| Number of GP contacts                  | 11.9 (12.6)                           | 10.2 (10.7)                           | 10.3(9.2)             | <0.01   |

Data are numbers (%) of subjects unless otherwise stated.

BMI = Body Mass Index; BPH = Benign Prostatic Hyperplasia; COPD = Chronic Obstructive Pulmonary Disease; ACEs = Angiotensin converting enzyme inhibitors; ARBs = Angiotensin receptor blocker; GP = General Practitioner; OPD = Out-patient Department. Data show mean (standard deviation; SD) unless otherwise stated. IQR = Interquartile range. \* Excluding missing data. NA= Not Available

**Supplementary Table S4: Survival analysis of CPRD Cohort, with a time-dependent variable of BMI**

---

|                                               | <i>Primary analysis</i> |                     |
|-----------------------------------------------|-------------------------|---------------------|
|                                               | <i>Adjusted HR</i>      | <i>95% CI</i>       |
| <i>Finasteride alone vs Tamsulosin alone</i>  | <i>1.26</i>             | <i>1.10 to 1.45</i> |
| <i>Dutasteride alone vs Tamsulosin alone</i>  | <i>1.31</i>             | <i>1.07 to 1.60</i> |
| <i>Dutasteride alone vs Finasteride alone</i> | <i>1.06</i>             | <i>0.86 to 1.30</i> |

---

BMI = Body Mass Index; HR= Hazard Ratio; CI = Confidence Interval



### **Assessment of confounding by tamsulosin**

To address the validity of tamsulosin as the control and assess whether it independently influenced metabolic health, the incidence of T2DM in men receiving tamsulosin versus BPH patients undergoing transurethral resection of the prostate (TURPS) (Read Codes, Table S1a) were compared and analysis performed as in the main text, with propensity score matching ( $\pm 0.05$ ) in a ratio of 1:1.

### **Results: CPRD**

Patients receiving TURP (Table S5) had suffered BPH for longer. This difference remained following propensity matching (1:1, n=1211 each group, Table S5), which did not eliminate all differences between groups e.g. the tamsulosin group received more statins. The risk of T2DM was not different (tamsulosin, adjusted HR: 0.71 (95%CI 0.46 to 1.11) vs TURPS) between groups following propensity scoring.

### **Results: NHIRD**

Patient characteristics in the TURP group are in Tables S6. Again, these groups were harder to match by propensity scoring. The patients in the tamsulosin group were at less risk (0.86 (95%CI 0.77 to 0.96)) when compared with patients in the TURP group following propensity scoring.

**Table S5. Baseline characteristics of Tamsulosin and TURP cohorts (UK CPRD database), before and after propensity matching**

|                                                                  | Before Propensity score matching |                |         | After Propensity score matching |                |         |
|------------------------------------------------------------------|----------------------------------|----------------|---------|---------------------------------|----------------|---------|
|                                                                  | Tamsulosin<br>N=16270            | TURP<br>N=1223 | P value | Tamsulosin<br>N=1211            | TURP<br>N=1211 | P value |
| Age (y) mean (SD (y))                                            | 69.1 (10.3)                      | 70.2 (9.3)     | <0.01   | 66.7 (11.0)                     | 70.2 (9.3)     | <0.01   |
| BMI category* (kg/m <sup>2</sup> )                               |                                  |                | <0.01   |                                 |                | 0.02    |
| 1 (<18.5)                                                        | 91 (0.6)                         | 7 (0.8)        |         | 6 (0.6)                         | 7 (0.8)        |         |
| 2 (18.5-25)                                                      | 4794 (33.6)                      | 347 (41.2)     |         | 353 (34.4)                      | 343 (41.0)     |         |
| 3 (25-30)                                                        | 6846 (48.1)                      | 368 (43.5)     |         | 509 (49.7)                      | 363 (43.4)     |         |
| 4 (>30)                                                          | 2518 (17.7)                      | 124 (14.7)     |         | 157 (15.3)                      | 123 (14.7)     |         |
| Smoking status*                                                  |                                  |                | <0.01   |                                 |                | 0.18    |
| 1 – Yes                                                          | 1859 (11.8)                      | 114 (11.9)     |         | 157 (13.5)                      | 112 (11.8)     |         |
| 2 – No                                                           | 7485 (47.4)                      | 467 (48.8)     |         | 589 (50.7)                      | 461 (50.7)     |         |
| 3 – Ex                                                           | 6458 (40.9)                      | 377 (39.3)     |         | 416 (35.8)                      | 373 (39.4)     |         |
| Physical activity*                                               |                                  |                | <0.01   |                                 |                | 0.57    |
| 1 – Inactive                                                     | 699 (9.6)                        | 37 (7.9)       |         | 59 (10.4)                       | 37 (8.0)       |         |
| 2 – Gentle                                                       | 2636 (34.1)                      | 156 (33.4)     |         | 290 (50.9)                      | 236 (51.1)     |         |
| 3 – Moderate                                                     | 3917 (50.7)                      | 241 (51.6)     |         | 35 (6.1)                        | 33 (7.1)       |         |
| 4 – Vigorous                                                     | 473 (6.1)                        | 33 (7.1)       |         | 186 (32.6)                      | 156 (33.8)     |         |
| Alcohol consumption*                                             |                                  |                | <0.01   |                                 |                | 0.54    |
| 1 – Yes                                                          | 12233 (84.4)                     | 745 (84.1)     |         | 896 (85.5)                      | 734 (84.0)     |         |
| 2 – No                                                           | 1850 (12.8)                      | 116 (13.1)     |         | 129 (12.3)                      | 115 (13.2)     |         |
| 3 – Ex                                                           | 416 (2.9)                        | 25 (2.8)       |         | 23 (2.2)                        | 25 (2.9)       |         |
| Duration of BPH (days) median (IQR)*                             | 56 (27-892)                      | 478 (108-1884) | <0.01   | 63 (28-1038)                    | 483 (108-1891) | <0.01   |
| Disease history                                                  |                                  |                |         |                                 |                |         |
| COPD                                                             | 1169 (7.2)                       | 62 (5.1)       | <0.01   | 72 (6.0)                        | 62 (5.1)       | 0.37    |
| Dyslipidaemia                                                    | 2711 (16.7)                      | 144 (11.8)     | 0.55    | 213 (17.6)                      | 142 (11.7)     | <0.01   |
| Hypertension                                                     | 5241 (32.2)                      | 404 (33.0)     | <0.01   | 366 (30.2)                      | 402 (33.2)     | 0.12    |
| Beta blockers                                                    | 3471 (21.3)                      | 201 (16.4)     | <0.01   | 214 (17.7)                      | 198 (16.4)     | 0.39    |
| Statins                                                          | 5871 (36.1)                      | 259 (21.2)     | <0.01   | 380 (31.4)                      | 257 (21.2)     | <0.01   |
| ACES                                                             | 3844 (23.6)                      | 231 (18.9)     | <0.01   | 224 (18.5)                      | 228 (18.8)     | 0.83    |
| ARBS                                                             | 1359 (8.4)                       | 52 (4.3)       | <0.01   | 92 (7.6)                        | 52 (4.3)       | <0.01   |
| Diuretics                                                        | 3669 (22.6)                      | 244 (20.0)     | 0.04    | 209 (17.3)                      | 242 (20.0)     | 0.09    |
| Oral corticosteroids                                             | 1497 (9.2)                       | 75 (6.1)       | <0.01   | 95 (7.8)                        | 74 (6.1)       | 0.09    |
| Number of GP contacts mean (SD) (3 m before or after index date) | 10.0 (2.4)                       | 8.0 (4.6)      | <0.01   | 9.1 (2.9)                       | 7.9 (4.6)      | <0.01   |

Data are numbers (%) of subjects unless otherwise stated. BMI = Body Mass Index; BPH = Benign Prostatic Hyperplasia; COPD = Chronic Obstructive Pulmonary Disease; ACEs = Angiotensin converting enzyme inhibitors; ARBs = Angiotensin receptor blocker; GP = General Practitioner; OPD = Out-patient Department. Data show mean (standard deviation; SD) unless otherwise stated. IQR = Interquartile range. \* Excluding missing data.

**Table S6. Baseline characteristics of Tamsulosin and TURP cohorts (NHIRD database), before and after propensity matching**

|                                                                       | Before Propensity score matching |                |         | After Propensity score matching |                |         |
|-----------------------------------------------------------------------|----------------------------------|----------------|---------|---------------------------------|----------------|---------|
|                                                                       | Tamsulosin<br>N=86263            | TURP<br>N=2260 | P value | Tamsulosin<br>N=2260            | TURP<br>N=2260 | P value |
| Age (y) mean (SD (y))                                                 | 65.7 (11.6)                      | 71.1 (8.5)     | <0.01   | 73.3 (10.1)                     | 71.1 (8.5)     | <0.01   |
| BMI category* (kg/m <sup>2</sup> )                                    |                                  |                |         |                                 |                |         |
| 1 (<18.5)                                                             | NA                               | NA             | NA      | NA                              | NA             | NA      |
| 2 (18.5-25)                                                           | NA                               | NA             | NA      | NA                              | NA             | NA      |
| 3 (25-30)                                                             | NA                               | NA             | NA      | NA                              | NA             | NA      |
| 4 (>30)                                                               | NA                               | NA             | NA      | NA                              | NA             | NA      |
| Smoking status*                                                       |                                  |                |         |                                 |                |         |
| 1 – Yes                                                               | NA                               | NA             | NA      | NA                              | NA             | NA      |
| 2 - No                                                                | NA                               | NA             | NA      | NA                              | NA             | NA      |
| 3 - Ex                                                                | NA                               | NA             | NA      | NA                              | NA             | NA      |
| Physical activity*                                                    |                                  |                |         |                                 |                |         |
| 1 - Inactive                                                          | NA                               | NA             | NA      | NA                              | NA             | NA      |
| 2 – Gentle                                                            | NA                               | NA             | NA      | NA                              | NA             | NA      |
| 3 – Moderate                                                          | NA                               | NA             | NA      | NA                              | NA             | NA      |
| 4 – Vigorous                                                          | NA                               | NA             | NA      | NA                              | NA             | NA      |
| Alcohol consumption*                                                  |                                  |                |         |                                 |                |         |
| 1 – yes                                                               | NA                               | NA             | NA      | NA                              | NA             | NA      |
| 2 – No                                                                | NA                               | NA             | NA      | NA                              | NA             | NA      |
| 3 – Ex                                                                | NA                               | NA             | NA      | NA                              | NA             | NA      |
| Duration of BPH (days) median (IQR)*                                  | 21 (39-724)                      | 207(66-1370)   | <0.01   | 39 (22-405)                     | 207 (66-1370)  | <0.01   |
| Disease history                                                       |                                  |                |         |                                 |                |         |
| COPD                                                                  | 7491(8.7)                        | 215 (9.5)      | <0.01   | 278 (12.3)                      | 215 (9.5)      | <0.01   |
| Dyslipidaemia                                                         | 14609 (16.9)                     | 303 (13.4)     | <0.01   | 353 (15.6)                      | 303 (13.4)     | 0.02    |
| Hypertension                                                          | 36653 (42.5)                     | 1015 (44.9)    | <0.01   | 1171 (51.8)                     | 1015 (44.9)    | <0.01   |
| Beta blockers                                                         | 20868 (24.2)                     | 486 (21.5)     | <0.01   | 615 (27.2)                      | 486 (21.5)     | <0.01   |
| Statins                                                               | 968 (11.2)                       | 208 (9.2)      | <0.01   | 215 (9.5)                       | 208 (9.2)      | 0.18    |
| ACES                                                                  | 17252 (20.0)                     | 373 (16.5)     | <0.01   | 461 (20.4)                      | 373 (16.5)     | <0.01   |
| ARBS                                                                  | 8799 (10.2)                      | 185 (8.2)      | <0.01   | 194 (8.6)                       | 185 (8.2)      | 0.22    |
| Diu                                                                   | 12718 (14.7)                     | 357 (15.8)     | <0.01   | 330 (14.6)                      | 357 (15.8)     | 0.05    |
| Oral corticosteroids                                                  | 24177 (28)                       | 581 (25.7)     | <0.01   | 660 (29.2)                      | 581 (25.7)     | <0.01   |
| Number of OPD visits<br>mean (SD) (3 m before or after index<br>date) | 10.3(9.2)                        | 12.0 (10.4)    | <0.01   | 10.3 (10.2)                     | 12.0 (10.4)    | <0.01   |

Data are numbers (%) of subjects unless otherwise stated. BMI = Body Mass Index; BPH = Benign Prostatic Hyperplasia; COPD = Chronic Obstructive Pulmonary Disease; ACEs = Angiotensin converting enzyme inhibitors; ARBs = Angiotensin receptor blocker; GP = General Practitioner; OPD = Out-patient Department. Data show mean (standard deviation; SD) unless otherwise stated. IQR = Interquartile range. \* Excluding missing data. NA = Not Available.
